# Supplementary material
Source: PubMed Central journal article supplement (PMC1785100)
Supplement: blood_blood-2006-01-011007_1.pdf [file blood_blood-2006-01-011007_1.pdf]

| Sample           | Age/Sex | Leukemia classification and phenotype                                                                                                                                                                                                    | Sorting marker  |
|------------------|---------|------------------------------------------------------------------------------------------------------------------------------------------------------------------------------------------------------------------------------------------|-----------------|
| LAA              | 61/F    | AML M0; >90% blasts, normal cytogenetics; positive for CD13, 33, 34, 45, 117, 11b, HLA-DR, MPO; dim positive for CD42a, 2, 19; negative for CD10                                                                                         | CD34+           |
| AGM              | 62/M    | AML M1; 94% blasts, normal cytogenetics; positive for HLA-DR, CD34, 45, 117; dim positive for CD13, CD33, CD19; negative for CD42a, 2, 11b                                                                                               | CD34+           |
| MFSS             | 36/F    | AML M1; 99% blasts, normal cytogenetics; positive for CD13, CD33, CD34, CD45, CD117; dim positive for HLA-DR, CD11b; negative for CD2, 19, 42a                                                                                           | CD34+ and CD33+ |
| JCS              | 40/M    | AML M1; 98% blasts; positive for CD13, 33, 34, 45, 11b, 19; dim positive for HLA-DR; negative for TdT, CD42a, 2, 10                                                                                                                      | CD34+ and CD33+ |
| DC               | 15/M    | AML M1; 94% blasts; positive for CD13, 33, 34, 45, 117, 2, 11b, HLA-DR; negative for CD19, 42a                                                                                                                                           | CD34+ and CD33+ |
| OAM <sup>a</sup> | 33/M    | AML M1; 94% blasts; positive for CD13, 33, 34, 45, 117, 15, 2, 11b, TdT, HLA-DR; negative for CD19, 42a, 14, 56                                                                                                                          | CD34+ and CD33+ |
| EMB              | 16/M    | AML M1; 94% blasts; positive for CD13, 33, 34, 45, 117, HLA-DR; dim positive for CD2, 11b; negative for CD42a, 19                                                                                                                        | CD34+ and CD33+ |
| ERR              | 53/F    | AML M1; 98% blasts; positive for CD13, 33, 34, 45, 117, MPO, CD11b; dim positive for HLA-DR, CD2; negative for CD19, 42a, 10                                                                                                             | CD34+ and CD33+ |
| UPN21            | 16/F    | AML; wbc (white blood cell) 287.5 k/ $\mu$ L, hgb (haemoglobin) 7.3 g/dL, plt (platelet) 18 k/ $\mu$ L; 81% blasts, 6% lymphs (lymphocytes), 1% meta (metamyelocytes), 11% monos (monocytes); positive for CD33, 13, 117, 52, 34, HLA-DR | CD34+; CD33+    |
| UPN1             | 47/F    | AML M2; wbc 169 k/ $\mu$ L, hgb 11 g/dL, plt 116 k/ $\mu$ L; 90% blast; positive for CD33, 13                                                                                                                                            | CD13+ and CD33+ |
| UPN16            | 74/F    | Secondary AML/MDS; wbc 99.7 k/ $\mu$ L, hgb 7.5 g/dL, plt 31 k/ $\mu$ L; 62% blasts; dim positive for CD117; positive for CD34, 13, 33, 9, HLA-DR                                                                                        | CD34+           |
| UPN22            | 11/F    | Relapsed AML; wbc 310 k/ $\mu$ L, hgb 10.5 g/dL, plt 27 k/ $\mu$ L; 85% blasts, 13% lymphs, 1% monos; positive for CD33, 64, HLA-DR; dim positive for MPO; negative for CD34, 117, 14, TdT                                               | CD34+; CD33+    |
| UPN18            | 62/F    | AML & prior non-Hodgkin lymphoma (NHL); wbc 106 k/ $\mu$ L, hgb 7.2 g/dL, plt 10 k/ $\mu$ L; 60% blasts; Positive for CD117, 33, 45; dim positive for CD34, 11b, 14, MPO and HLA-DR; negative for CD10, 20, 56, 2, 7, TdT, 64            | CD34+           |

|       |      |                                                                                                                                                                                                                                    |                                        |
|-------|------|------------------------------------------------------------------------------------------------------------------------------------------------------------------------------------------------------------------------------------|----------------------------------------|
| UPN20 | 53/M | CML-blast crisis stage; wbc 135.8 k/ $\mu$ L, hgb 9.3 g/dL, plt 319 k/ $\mu$ L; 52% blasts, 22% segs (neutrophils), 9% lymphs, 9% monos; positive for CD34, 33, 13, 9, 5, 38, 56, HLA-DR; negative for MPO, TdT; dim for CD41, 117 | CD34+;<br>CD33+                        |
| UPN17 | 27/F | CML-chronic phase; wbc 165 k/ $\mu$ L, hgb 9.6 g/dL, plt 308 k/ $\mu$ L; 0% blasts, 75%segs                                                                                                                                        | CD34+                                  |
| UPN2  | 58/M | Acute leukemia from CMML; wbc 209 k/ $\mu$ L, hgb 8.8 g/dL, plt 55 k/ $\mu$ L; 86% blast; positive for CD33, 34                                                                                                                    | CD33+ and<br>CD34+                     |
| UPN3  | 64/F | T prolymphocytic CLL; wbc 157 k/ $\mu$ L; 90% blast; positive for CD5; negative for CD33                                                                                                                                           | CD5+ and<br>CD33-                      |
| UPN19 | 21/F | Microgranular variant APLM; wbc 87.4 k/ $\mu$ L, hgb 9.2 g/dL, plt 12 k/ $\mu$ L; 71% blasts, 10% segs, 9% lymphs; positive for CD117, 33, 13, MPO; negative for CD14, 34, 19, 64, HLA-DR                                          | CD34+;<br>CD33+;<br>CD33+ and<br>CD34- |

Note: Subtypes (M0, M1, and M2) of acute myeloid leukemia (AML) were defined according to the French-American-British (FAB) classification. CML – chronic myelogenous leukemia, APLM – acute promyelocytic leukemia, CMML – chronic myelomonocytic leukemia, CLL – chronic lymphocytic leukemia, MDS – myelodysplastic syndrome.

<sup>a</sup> We also collected a sample for this patient during relapse; cell surface markers of blasts were the same as at diagnosis.
