# Supplementary material
Source: PubMed Central journal article supplement (PMC1785100)
Supplement: blood_blood-2006-01-011007_2.pdf [file blood_blood-2006-01-011007_2.pdf]

| Sample          | Sequence variation                                                                                                             | Haplogroup |
|-----------------|--------------------------------------------------------------------------------------------------------------------------------|------------|
| Leukemia        |                                                                                                                                |            |
| LAA             | 16362-16482-16526-239-263                                                                                                      | H          |
| AGM             | 16182C-16183C-16189-16217-16482-16519-73-263-499                                                                               | B4b        |
| MFSS            | 16189-16223-16245-16278-16294-16309-16390-73-143-146-152-263                                                                   | L2a        |
| JCS             | 16038-16209-16223-16294-16311-16519-73-146-263-374+A                                                                           | L3f        |
| DC              | 16223-16278-16286-16294-16309-16390-16519-73-146-152-195-263                                                                   | L2a        |
| OAM             | 16223-16260-16325-16362-16519-73-152-183-263-489                                                                               | D1         |
| EMB             | 16223-16239-16288-16325-16362-73-210-228-263-489                                                                               | D1         |
| ERR             | 16111-16126-16223-16259-16290-16319-16327-16362-16519-73-146-153-235-263-(523-524)delAC                                        | A2         |
| UPN21           | 16223-16325-16362-73-200-263-489                                                                                               | D1         |
| UPN1            | 16126-16292-16294-16519-73-146-152-263-279                                                                                     | T2         |
| UPN16           | 16069-16126-73-185-228-263-295-462-482-489                                                                                     | J1c        |
| UPN22           | 16222-16519-263-319                                                                                                            | H          |
| UPN18           | 16086-16111-16223-16290-16319-16362-64-73-146-153-235-263-(523-524)delAC                                                       | A2         |
| UPN20           | 16111-16209-16223-16290-16293C-16319-16362-16519-64-73-146-153-235-263-(523-524)delAC                                          | A2         |
| UPN17           | 16183C-16189-16223-16278-16519-73-153-189R-195-225-226-263                                                                     | X2b        |
| UPN2            | 16069-16126-73-185-188-228-234-260-263-295-462-489                                                                             | J1c        |
| UPN3            | 16093-16129-16519-152-263                                                                                                      | H          |
| UPN19           | 16519-146-263                                                                                                                  | H          |
| Healthy control |                                                                                                                                |            |
| Donor 1         | 16192-16270-73-150-263                                                                                                         | U5b        |
| Donor 2         | 16223-16278-16294-16390-73-146-152-195-263-(523-524)delAC                                                                      | L2a        |
| Donor 3         | 16093-16129-16148-16168-16172-16187-16188G-16189-16223-16230-16278-16293-16311-16320-93-95C-185-189-236-247-263-(523-524)delAC | L0a1       |
| Donor 4         | 16126-16294-16296-16519-73-263                                                                                                 | T2         |
| Donor 5         | 16270-16292-16362-73-150-263-517                                                                                               | U5b        |
| Donor 6         | 16209-16223-16240-16324-73-263-489-(523-524)delAC                                                                              | M7a1       |
| Donor 7         | 16172-16219-16235-16278-16355-16519-73-146-263                                                                                 | U6         |
| Donor 8         | 16169-16299-16519-263                                                                                                          | H          |
| Donor 9         | 16111-16189-16224-16256-16311-16519-56+C-58-73-263-497-(523-524) insAC                                                         | K1a        |
| Donor 10        | 16298-16519-72-263                                                                                                             | pre-V      |

Note: Sequence variation of each individual was scored according to the consensus sequence of the single cells. Positions were numbered according to the revised Cambridge Reference Sequence (CRS)<sup>1</sup>. Suffixes C and G indicated transversions, and

“+” indicated insertions. Indels (insertion / deletion) were recorded at the last possible site. The length mutations of the C-tract in regions 16184-16193 and 303-309 were not included. All samples had 315+C in the second hypervariable segment of mtDNA control region. Healthy donors 1 to 5 are from Ogasawara et al.<sup>2</sup>, donors 6 (35/M), 7 (32/M), 8 (25/M), 9 (57/M), and 10 (39/M) are newly sequenced in this study. Each mtDNA was assigned to respective haplogroup based on the classification system of world mtDNA phylogeny<sup>3-7</sup>.
