# Supplementary material
Source: PubMed Central journal article supplement (PMC1785100)
Supplement: blood_blood-2006-01-011007_3.pdf [file blood_blood-2006-01-011007_3.pdf]

| Sample & Cell type | Haplotype <sup>a</sup>          | No. of Cell |
|--------------------|---------------------------------|-------------|
| LAA<br>CD34+       | Aggregate sequence              | 56          |
|                    | +16068T>Y                       | 1           |
|                    | +16099C>Y                       | 1           |
|                    | +16354C>Y                       | 1           |
|                    | +16391G>R                       | 1           |
|                    | +16459C>Y                       | 1           |
|                    | +16473G>R                       | 1           |
|                    | +369C>Y                         | 1           |
|                    | +441C>Y                         | 1           |
|                    | +557C>Y                         | 1           |
|                    | +568C>Y                         | 1           |
|                    | +8CT6C/9CT6C, 571C>Y            | 1           |
|                    | 7CT6C/8CT6C                     | 1           |
|                    | 8CT6C/9CT6C                     | 24          |
|                    | 8CT6C/9CT6C/10CT6C              | 2           |
|                    | 9CT6C                           | 1           |
| AGM<br>CD34+       | Aggregate sequence <sup>b</sup> | 42          |
|                    | +16339C>Y, 9CT6C/10CT6C/11CT6C  | 1           |
|                    | +16378C>Y, 9CT6C/10CT6C, 378C>Y | 1           |
|                    | +129T>Y, 9CT6C/10CT6C           | 1           |
|                    | +140C>Y, 9CT6C/10CT6C           | 2           |
|                    | +183A>A/T, 9CT6C/10CT6C         | 1           |
|                    | +268C>Y, 9CT6C/10CT6C           | 1           |
|                    | +9CT6C/10CT6C, 378C>Y           | 1           |
|                    | 9CT6C, 523-524insAC/non-ins     | 1           |
|                    | 9CT6C                           | 6           |
|                    | 9CT6C/10CT6C                    | 39          |
| MFSS<br>CD33+CD34+ | Aggregate sequence <sup>c</sup> | 87          |
|                    | +16131T>Y                       | 1           |
|                    | +16190C>Y                       | 1           |
|                    | +52T>Y                          | 1           |
|                    | +71G>R                          | 1           |
|                    | +135T>Y                         | 1           |
|                    | +139T>C                         | 1           |
|                    | +422T>Y                         | 1           |
|                    | +556A>R                         | 1           |
|                    | 523-524delAC/non-del            | 1           |
| JCS<br>CD33+CD34+  | Aggregate sequence              | 40          |
|                    | +16025T>Y                       | 1           |
|                    | +16148C>Y                       | 1           |
|                    | +16331A>R, 8CT6C/9CT6C          | 1           |
|                    | +16353C>Y                       | 1           |

|              |                                  |    |
|--------------|----------------------------------|----|
|              | +16365C>Y, 8CT6C/9CT6C           | 1  |
|              | +16449C>Y                        | 1  |
|              | +16465C>Y, 588T>Y                | 1  |
|              | +56A>R                           | 1  |
|              | +112C>Y, 8CT6C/9CT6C             | 1  |
|              | +185G>R, 8CT6C/9CT6C             | 1  |
|              | +8CT6C/9CT6C, 384A>R             | 1  |
|              | +532A>R                          | 1  |
|              | 523-524delAC/non-del             | 1  |
|              | 8CT6C/9CT6C                      | 43 |
| DC           | Aggregate sequence               | 40 |
| CD33+CD34+   | +16087A>R, 16150C>Y              | 1  |
|              | +16110G>R                        | 1  |
|              | +16123T>Y, 16150C>Y, 8CT6C/9CT6C | 1  |
|              | +16150C>Y                        | 27 |
|              | +16150C>Y, 523-524insAC/non-ins  | 1  |
|              | +16150C>Y, 268C>Y                | 1  |
|              | +16150C>Y, 8CT6C/9CT6C           | 2  |
|              | +16213G>R, 16539A>R              | 1  |
|              | +16228C>Y, 8CT6C/9CT6C           | 1  |
|              | +16257C>Y                        | 1  |
|              | +16343A>R                        | 1  |
|              | +16359T>Y                        | 1  |
|              | +59T>Y                           | 1  |
|              | +541C>Y                          | 1  |
|              | 523-524insAC/non-ins             | 2  |
|              | 7CT6C/8CT6C                      | 3  |
|              | 8CT6C/9CT6C                      | 10 |
| OAM          | Aggregate sequence               | 78 |
| CD33+CD34+   | +16098A>R                        | 1  |
|              | +16237A>R                        | 1  |
|              | +16321C>Y                        | 1  |
|              | +16488C>C/A                      | 5  |
|              | +16494C>Y                        | 1  |
|              | +16498C>Y                        | 1  |
|              | +16533T>Y                        | 1  |
|              | +64C>Y                           | 1  |
|              | +460T>Y                          | 1  |
|              | 523-524insAC/non-ins             | 1  |
| relapsed OAM | Aggregate sequence <sup>d</sup>  | 67 |
| CD33+CD34+   | +16103A>R, 16530A>R              | 1  |
|              | +16164A>A/C                      | 1  |
|              | +16188insC/non-ins               | 1  |
|              | +16295C>Y, 16488C                | 1  |
|              | 16488C                           | 25 |
| EMB          | Aggregate sequence               | 62 |

|            |                                 |    |
|------------|---------------------------------|----|
| CD33+CD34+ | +16064T>Y, 523-524delAC/non-del | 1  |
|            | +16204G>R                       | 1  |
|            | +16249T>Y, 403T>Y               | 1  |
|            | +16277A>R, 75G>R, 142T>Y        | 1  |
|            | +16290C>Y                       | 1  |
|            | +16292C>Y                       | 1  |
|            | +16292delC/non-del              | 1  |
|            | +16297T>Y                       | 1  |
|            | +16298T>Y                       | 1  |
|            | +16324T>Y                       | 1  |
|            | +16325T>Y                       | 1  |
|            | +16366delC/non-del              | 1  |
|            | +16380delC/non-del              | 1  |
|            | +16381T>Y                       | 1  |
|            | +16443T>Y                       | 1  |
|            | +16510A>R                       | 1  |
|            | +16550T>Y                       | 1  |
|            | +10T>Y                          | 1  |
|            | +42T>Y                          | 1  |
|            | +89T>Y                          | 1  |
|            | +99T>Y                          | 1  |
|            | +152T>Y, 460T>Y                 | 1  |
|            | +267T>Y                         | 1  |
|            | +321T>Y                         | 1  |
|            | +383T>Y                         | 1  |
|            | +390A>A/C                       | 1  |
|            | +399T>Y                         | 1  |
|            | +399T>Y, 495C>Y                 | 1  |
|            | +411C>Y                         | 1  |
|            | +431C>Y                         | 1  |
|            | +538A>R                         | 1  |
|            | +556A>R                         | 1  |
| +583G>R    | 1                               |    |
| ERR        | Aggregate sequence              | 88 |
| CD33+CD34+ | +16262C>Y                       | 2  |
|            | +16353C>Y                       | 1  |
|            | +16424T>Y                       | 1  |
|            | +16429C>Y                       | 1  |
|            | +16508C>Y                       | 1  |
| UPN21      | Aggregate sequence              | 75 |
| CD34+      | +16380insC/non-ins              | 1  |
|            | +16560C>Y                       | 1  |
|            | +146T>Y                         | 1  |
|            | +415A>R, 470A>R                 | 1  |
|            | 523-524insAC/non-ins            | 1  |
|            | 8CT6C/9CT6C                     | 2  |
| UPN21      | Aggregate sequence              | 16 |

|                    |                                          |     |
|--------------------|------------------------------------------|-----|
| granulocyte        | +16132A>R                                | 1   |
|                    | +16222C>Y                                | 1   |
|                    | +16253A>R                                | 1   |
|                    | +16293A>R                                | 1   |
|                    | +13A>R                                   | 1   |
|                    | +343C>Y                                  | 1   |
|                    | 8CT6C/9CT6C                              | 2   |
| UPN1               | Aggregate sequence                       | 123 |
| CD13+CD33+         | +16123T>Y                                | 1   |
|                    | +16286C>Y                                | 1   |
|                    | +16291C>Y                                | 1   |
|                    | +143G>R                                  | 1   |
|                    | +390A>R, 493A>R                          | 1   |
|                    | 8CT6C                                    | 1   |
|                    | 8CT6C/9CT6C                              | 4   |
| 9CT6C/10CT6C       | 10                                       |     |
| 8CT6C/9CT6C/10CT6C | 3                                        |     |
| UPN16              | Aggregate sequence                       | 83  |
| CD34+              | +16356T>Y, 16542C>Y                      | 1   |
|                    | +405T>Y                                  | 1   |
|                    | +577G>R                                  | 1   |
|                    | 7CT6C/8CT6C                              | 6   |
| UPN22              | Aggregate sequence                       | 23  |
| CD34+              | +16037A>R, 16320C>T                      | 1   |
|                    | +16320C>T                                | 2   |
|                    | +16320C>T, 146T>Y, 195T>C                | 1   |
|                    | +16320C>T, 195T>C                        | 1   |
|                    | +16320C>T, 195T>C, 8CT6C/9CT6C           | 1   |
|                    | +16320C>T, 9CT6C                         | 1   |
|                    | +16320C>Y                                | 4   |
|                    | +16320C>Y, 16380delC/non-del             | 1   |
|                    | +16320C>Y, 195T>Y, 8CT6C/9CT6C           | 1   |
|                    | +16320C>Y, 8CT6C/9CT6C                   | 1   |
|                    | +16320C>Y, 8CT6C/9CT6C, 515A>R           | 1   |
|                    | +16222C>Y, 16239C>Y, 319T>Y              | 1   |
|                    | +(16222), 16239C>T, (319)                | 1   |
|                    | +(16222), 16239C>T, 9CT6C, (319), 415A>R | 1   |
|                    | +15C>Y, 9CT6C/10CT6C                     | 1   |
|                    | 9CT6C                                    | 6   |
| 8CT6C/9CT6C        | 12                                       |     |
| 8CT6C/9CT6C/10CT6C | 4                                        |     |
| 9CT6C/10CT6C       | 1                                        |     |
| UPN22              | Aggregate sequence                       | 12  |
| granulocyte        | +16029T>Y, 378C>C/A                      | 1   |
|                    | +16030C>Y                                | 1   |
|                    | +16068T>Y                                | 1   |

---

|       |                                           |    |
|-------|-------------------------------------------|----|
|       | +16122A>R, 9CT6C                          | 1  |
|       | +16167C>Y, 8CT6C/9CT6C                    | 1  |
|       | +16189T>C                                 | 1  |
|       | +16285A>R, 9CT6C/10CT6C                   | 1  |
|       | +16320C>T                                 | 1  |
|       | +16320C>T, 146T>C, 195T>C                 | 1  |
|       | +16320C>T, 195T>C                         | 1  |
|       | +16320C>T, 195T>C, 204T>C                 | 1  |
|       | +16320C>T, 386C>Y, 550A>R                 | 1  |
|       | +16320C>T, 7CT6C                          | 1  |
|       | +16320C>T, 8CT6C/9CT6C                    | 1  |
|       | +16320C>Y                                 | 3  |
|       | +16320C>Y, 16329G>G/C, 60T>Y, 7CT6C/8CT6C | 1  |
|       | +16320C>Y, 16452T>Y, 8CT6C/9CT6C          | 1  |
|       | +16320C>Y, 515A>A/C                       | 1  |
|       | +16320C>Y, 8CT6C/9CT6C                    | 2  |
|       | +16357T>C, 461C>Y                         | 1  |
|       | +16394C>Y, 8CT6C/9CT6C, 456C>Y            | 1  |
|       | +16397T>Y                                 | 1  |
|       | +16409T>Y                                 | 1  |
|       | +16450G>G/T, 8CT6C/9CT6C                  | 1  |
|       | +16456G>R, 16466A>R, 8CT6C/9CT6C          | 1  |
|       | +16568T>Y                                 | 1  |
|       | +(16222), 16239C>T, 16368T>Y, (319)       | 1  |
|       | +(16222), 16239C>T, 8CT6C/9CT6C, (319)    | 2  |
|       | +(16222), 16239C>T, 9CT6C, (319)          | 1  |
|       | +(16222), 16239C>T, 9CT6C, (319), 645A>R  | 1  |
|       | +16222C>Y, 16239C>Y, 319T>Y               | 2  |
|       | +16222C>Y, 16239C>Y, 319T>Y, 8CT6C/9CT6C  | 1  |
|       | +186C>T                                   | 1  |
|       | +195T>C                                   | 1  |
|       | +266T>Y, 9CT6C                            | 1  |
|       | 7CT6C/8CT6C                               | 1  |
|       | 8CT6C/9CT6C                               | 9  |
|       | 8CT6C/9CT6C, 523-524insAC/non-ins         | 1  |
|       | 8CT6C/9CT6C/10CT6C                        | 3  |
|       | 8CT6C/9CT6C/10CT6C, 523-524insAC/non-ins  | 1  |
|       | 9CT6C                                     | 3  |
| UPN18 | Aggregate sequence                        | 77 |
| CD34+ | +16094T>Y, 16158A>R                       | 1  |
|       | +16179C>Y, 16186C>Y                       | 1  |
|       | +16188C>Y                                 | 1  |
|       | +16484T>C                                 | 1  |
|       | +573insC/non-ins                          | 1  |
|       | 7CT6C/8CT6C                               | 2  |
|       | 8CT6C/9CT6C                               | 8  |
| UPN20 | Aggregate sequence                        | 73 |
| CD34+ | +16462T>Y                                 | 1  |

---

|                      |                                                        |    |
|----------------------|--------------------------------------------------------|----|
|                      | 523-524insAC/non-ins                                   | 11 |
| UPN20<br>granulocyte | Aggregate sequence                                     | 65 |
|                      | +16259C>C/A, 523-524insAC/non-ins                      | 1  |
|                      | +16053C>Y, 16500T>Y, 480T>Y                            | 1  |
|                      | +16150C>T                                              | 1  |
|                      | +16245C>Y                                              | 1  |
|                      | +16432A>R, 30T>Y                                       | 1  |
|                      | +58T>Y                                                 | 1  |
|                      | +98C>T                                                 | 1  |
|                      | +139T>Y                                                | 1  |
|                      | +438delC/non-del                                       | 1  |
|                      | +466T>Y                                                | 1  |
|                      | +522C>Y                                                | 1  |
|                      | +571C>Y                                                | 1  |
|                      | +598A>R                                                | 1  |
|                      | +602C>Y                                                | 1  |
|                      | 523-524insAC/non-ins                                   | 12 |
|                      | 523-524non-del                                         | 1  |
| UPN17<br>CD34+       | Aggregate sequence <sup>e</sup>                        | 28 |
|                      | +16081A>R, 189G, 559C>Y                                | 1  |
|                      | +16183A>Y, 8CT6C/9CT6C/10CT6C                          | 1  |
|                      | +16348C>Y                                              | 1  |
|                      | +16359T>Y, 189A, 424T>Y                                | 1  |
|                      | +16452T>Y, 189A, 454T>Y, 591C>Y,<br>8CT6C/9CT6C/10CT6C | 1  |
|                      | +189G, 7CT6C/8CT6C/9CT6C                               | 1  |
|                      | +189G                                                  | 11 |
|                      | +189G, 514C>Y                                          | 1  |
|                      | +189G, 8CT6C/9CT6C/10CT6C                              | 3  |
|                      | +192T>Y, 8CT6C/9CT6C/10CT6C                            | 1  |
|                      | +442T>Y, 189A                                          | 1  |
|                      | 189A                                                   | 7  |
|                      | 189A, 8CT6C/9CT6C/10CT6C                               | 6  |
|                      | 189A, 9CT6C/10CT6C                                     | 1  |
|                      | 8CT6C/9CT6C/10CT6C                                     | 12 |
|                      | 9CT6C/10CT6C                                           | 3  |
| UPN2<br>CD33+CD34+   | Aggregate sequence                                     | 66 |
|                      | +16052C>Y                                              | 1  |
|                      | +16132A>R, 260G>R                                      | 1  |
|                      | +16188C>Y                                              | 1  |
|                      | +16203A>R, 281A>R                                      | 1  |
|                      | +16264C>Y, 260G>R                                      | 1  |
|                      | +16353C>Y                                              | 1  |
|                      | +16467C>Y                                              | 1  |
|                      | +16565C>Y                                              | 1  |
|                      | +185G>R                                                | 1  |
|                      | +185G>R, 260G>R                                        | 1  |

|             |                                   |    |
|-------------|-----------------------------------|----|
|             | +260G>R                           | 18 |
|             | +260G>R, 313C>Y                   | 1  |
|             | +260G>R, 455T>Y                   | 1  |
| UPN3        | Aggregate sequence <sup>f</sup>   | 74 |
| CD5+CD33-   | +16278C>Y                         | 1  |
|             | +16328C>Y, 9CT6C/10CT6C           | 1  |
|             | +16565C>Y                         | 1  |
|             | +42T>Y                            | 1  |
|             | 8CT6C                             | 3  |
|             | 9CT6C                             | 3  |
|             | 9CT6C/10CT6C                      | 1  |
|             | 8CT6C/9CT6C/10CT6C                | 4  |
| UPN19       | Aggregate sequence                | 52 |
| CD34+       | +16025T>Y                         | 1  |
|             | +16439C>T                         | 1  |
|             | +16546C>Y                         | 1  |
|             | +185G>R                           | 1  |
|             | 8CT6C                             | 2  |
|             | 8CT6C/9CT6C                       | 8  |
|             | 9CT6C/10CT6C                      | 28 |
|             | 8CT6C/9CT6C/10CT6C                | 1  |
|             | 523-524insAC/non-ins              | 1  |
| UPN19       | Aggregate sequence                | 41 |
| CD33+CD34-  | +16068T>Y                         | 1  |
|             | +16088T>Y, 9CT6C/10CT6C           | 1  |
|             | +16101T>Y                         | 1  |
|             | +16152T>Y                         | 1  |
|             | +16173C>Y, 9CT6C/10CT6C           | 1  |
|             | +16191C>Y                         | 1  |
|             | +16271T>Y, 9CT6C/10CT6C           | 1  |
|             | +16471G>R                         | 1  |
|             | +27C>Y                            | 1  |
|             | +30T>Y                            | 1  |
|             | +40T>Y, 62G>R, 8CT6C/9CT6C        | 1  |
|             | +95A>R, 9CT6C/10CT6C              | 1  |
|             | +133T>Y, 9CT6C/10CT6C             | 1  |
|             | +135T>Y, 9CT6C/10CT6C             | 1  |
|             | +269C>Y, 9CT6C/10CT6C             | 1  |
|             | 523-524insAC/non-ins              | 2  |
|             | 8CT6C/9CT6C                       | 10 |
|             | 8CT6C/9CT6C, 523-524insAC/non-ins | 2  |
|             | 9CT6C/10CT6C                      | 18 |
|             | 8CT6C/9CT6C/10CT6C                | 4  |
|             | 9CT6C/10CT6C/11CT6C               | 2  |
| UPN19       | Aggregate sequence                | 34 |
| granulocyte | +16146A>R                         | 1  |

---

|                      |                                       |    |
|----------------------|---------------------------------------|----|
|                      | +16189T>Y                             | 1  |
|                      | +16223C>Y                             | 1  |
|                      | +16233A>R, 472A>R                     | 1  |
|                      | +16237A>R                             | 1  |
|                      | +16239C>Y, 146T>Y, 8CT6C/9CT6C/10CT6C | 1  |
|                      | +16257C>Y                             | 1  |
|                      | +16258A>R                             | 1  |
|                      | +16278C>Y                             | 1  |
|                      | +147C>Y                               | 1  |
|                      | +230A>R, 9CT6C/10CT6C                 | 1  |
|                      | +374A>G                               | 1  |
|                      | +498delC                              | 1  |
|                      | +508A>R                               | 1  |
|                      | +511C>Y                               | 1  |
|                      | +645A>R                               | 1  |
|                      | 523-524insAC/non-ins                  | 3  |
|                      | 8CT6C                                 | 1  |
|                      | 8CT6C/9CT6C                           | 2  |
|                      | 9CT6C/10CT6C                          | 21 |
|                      | 10CT6C/11CT6C                         | 1  |
|                      | 9CT6C/10CT6C/11CT6C                   | 1  |
| Donor 6 <sup>g</sup> | Aggregate sequence                    | 55 |
| CD34+                | +16039G>R                             | 1  |
|                      | +16128C>T                             | 1  |
|                      | +16131T>Y                             | 1  |
|                      | +16172T>Y                             | 1  |
|                      | +16214C>Y                             | 1  |
|                      | +16240A>R                             | 1  |
|                      | +16267C>C/A                           | 1  |
|                      | +(16324)                              | 1  |
|                      | +412G>R                               | 1  |
|                      | +480T>Y                               | 1  |
|                      | 8CT6C/9CT6C                           | 7  |
|                      | 9CT6C/10CT6C                          | 18 |
|                      | 8CT6C/9CT6C/10CT6C                    | 4  |
|                      | 9CT6C/10CT6C/11CT6C                   | 1  |
| Donor 7              | Aggregate sequence                    | 40 |
| CD34+                | +16022T>Y, 8CT6C/9CT6C                | 1  |
|                      | +16025T>Y                             | 1  |
|                      | +16076C>Y, 16409T>Y, 16502T>Y         | 1  |
|                      | +16086T>Y                             | 1  |
|                      | +16087A>R, 8CT6C/9CT6C                | 1  |
|                      | +16096G>R                             | 1  |
|                      | +16100A>R                             | 1  |
|                      | +16131T>Y                             | 1  |
|                      | +16191C>Y                             | 1  |
|                      | +16211C>Y                             | 1  |
|                      | +16224T>T/G, 8CT6C/9CT6C              | 1  |

---



---

|         |                               |    |
|---------|-------------------------------|----|
|         | +16288T>Y                     | 1  |
|         | +16309A>R                     | 1  |
|         | +16378C>Y, 16409T>Y           | 1  |
|         | +16381T>Y                     | 1  |
|         | +16408C>Y, 8CT6C/9CT6C        | 1  |
|         | +16468T>Y, 379A>R             | 1  |
|         | +16490G>R                     | 1  |
|         | +16507C>Y, 8CT6C/9CT6C        | 1  |
|         | +16539A>A/C                   | 1  |
|         | +16544T>Y                     | 1  |
|         | +10T>Y, 146T>Y, 7CT6C/8CT6C   | 1  |
|         | +14T>Y                        | 1  |
|         | +59T>Y, 145C>Y                | 1  |
|         | +146T>Y                       | 1  |
|         | +161T>Y                       | 1  |
|         | +204T>Y, 7CT6C/8CT6C          | 1  |
|         | +230A>R                       | 1  |
|         | +234A>R                       | 1  |
|         | +305C>Y, 8CT6C/9CT6C          | 1  |
|         | +372T>Y                       | 1  |
|         | +390A>R                       | 1  |
|         | +578T>Y                       | 1  |
|         | +8CT6C/9CT6C, 379A>R          | 1  |
|         | +8CT6C/9CT6C, 410G>R, 549C>Y  | 1  |
|         | 523-524delAC/non-del          | 1  |
|         | 7CT6C                         | 2  |
|         | 7CT6C/8CT6C                   | 5  |
|         | 8CT6C/9CT6C                   | 10 |
| Donor 8 | Aggregate sequence            | 37 |
| CD34+   | +16038A>R, 8CT6C/9CT6C        | 1  |
|         | +16082C>Y, 7CT6C              | 1  |
|         | +16189T>Y                     | 1  |
|         | +16238T>Y                     | 1  |
|         | +16275A>R                     | 1  |
|         | +16282C>Y                     | 1  |
|         | +16282C>Y, 16391G>R           | 1  |
|         | +16296C>Y                     | 1  |
|         | +16308T>Y, 525C>Y             | 1  |
|         | +16315T>Y, 8CT6C/9CT6C        | 1  |
|         | +16387A>R                     | 1  |
|         | +16391G>R                     | 1  |
|         | +16392T>Y                     | 1  |
|         | +16392T>Y, 16508C>C/A, 260G>R | 1  |
|         | +16400C>Y, 8CT6C/9CT6C        | 1  |
|         | +16403C>Y, 8CT6C/9CT6C        | 1  |
|         | +16502T>Y, 8CT6C/9CT6C        | 1  |
|         | +16533T>Y, 8CT6C/9CT6C        | 1  |
|         | +16537C>Y                     | 1  |
|         | +11C>Y, 8CT6C/9CT6C           | 1  |

---

---

|                      |                                              |    |
|----------------------|----------------------------------------------|----|
|                      | +12T>Y                                       | 1  |
|                      | +16A>R, 8CT6C/9CT6C                          | 1  |
|                      | +39C>Y, 8CT6C/9CT6C                          | 1  |
|                      | +42T>Y, 154T>Y, 491C>Y, 523-524delAC/non-del | 1  |
|                      | +77A>R, 8CT6C/9CT6C                          | 1  |
|                      | +131T>Y                                      | 1  |
|                      | +142T>Y                                      | 1  |
|                      | +146T>Y                                      | 1  |
|                      | +273C>Y, 8CT6C/9CT6C                         | 1  |
|                      | +345C>Y                                      | 1  |
|                      | +346T>Y                                      | 1  |
|                      | +441C>Y                                      | 1  |
|                      | +538A>R                                      | 1  |
|                      | +570C>Y                                      | 1  |
|                      | +8CT6C/9CT6C, 378C>Y                         | 1  |
|                      | 8CT6C/9CT6C                                  | 20 |
|                      | 8CT6C/9CT6C/10CT6C                           | 1  |
| Donor 9 <sup>h</sup> | Aggregate sequence                           | 55 |
| CD34+                | +16086T>Y, 588T>Y                            | 1  |
|                      | +16095C>C/A, 16354C>T                        | 1  |
|                      | +16129G>A, 523-524insAC/non-ins              | 1  |
|                      | +16131T>Y                                    | 1  |
|                      | +16144T>Y                                    | 1  |
|                      | +16356T>Y                                    | 1  |
|                      | +16368T>C                                    | 1  |
|                      | +16390G>R, 523-524insAC/non-ins              | 1  |
|                      | +16526G>R                                    | 1  |
|                      | +56insT, 460T>Y                              | 1  |
|                      | +56A>T                                       | 3  |
|                      | +56A>T, 545G>R                               | 1  |
|                      | +64C>T                                       | 1  |
|                      | +(73)                                        | 1  |
|                      | +150C>Y, 292T>Y                              | 1  |
|                      | +152T>C                                      | 1  |
|                      | +185G>R, 195T>A                              | 1  |
|                      | +195T>A                                      | 1  |
|                      | +195T>A, 7CT6C/8CT6C                         | 1  |
|                      | +195T>T/A                                    | 4  |
|                      | +195T>T/A, 383T>Y                            | 1  |
|                      | +251G>R                                      | 1  |
|                      | +291A>A/T                                    | 1  |
|                      | +292T>Y                                      | 2  |
|                      | +292T>Y, 588T>Y, 523-524insAC/non-ins        | 1  |
|                      | +370C>Y                                      | 1  |
|                      | +535C>Y                                      | 1  |
|                      | +541C>Y                                      | 1  |
|                      | +587C>Y                                      | 1  |
|                      | 523-524insAC/non-ins                         | 3  |

---

|                     |                                  |   |    |
|---------------------|----------------------------------|---|----|
| Donor 10            | Aggregate sequence               |   | 51 |
| CD34+               | +16124T>Y                        |   | 1  |
|                     | +16217T>Y                        |   | 1  |
|                     | +16239C>Y, 8CT6C/9CT6C           |   | 1  |
|                     | +16293A>G                        | 1 |    |
|                     | +16378C>Y, 8CT6C/9CT6C           |   | 1  |
|                     | +16506T>Y                        |   | 1  |
|                     | +16537C>Y, 16565C>Y, 8CT6C/9CT6C |   | 1  |
|                     | +182C>Y, 8CT6C/9CT6C             |   | 1  |
|                     | +343C>Y, 8CT6C/9CT6C             |   | 1  |
|                     | +410G>R                          |   | 1  |
|                     | +571C>Y                          |   | 1  |
|                     | +8CT6C/9CT6C, 593T>Y             |   | 1  |
|                     | 7CT6C                            |   | 1  |
|                     | 7CT6C/8CT6C                      |   | 1  |
|                     | 7CT6C/8CT6C/9CT6C                |   | 1  |
|                     | 8CT6C/9CT6C                      |   | 28 |
| Donor 2             | Aggregate sequence               |   | 61 |
| Granulocyte from BM | +16028T>Y, 16372T>Y              |   | 1  |
|                     | +16054A>G                        | 1 |    |
|                     | +16105T>Y                        |   | 1  |
|                     | +16114C>Y                        |   | 1  |
|                     | +16127A>R                        |   | 1  |
|                     | +16131T>Y                        |   | 1  |
|                     | +16208G>R                        |   | 1  |
|                     | +16232C>Y                        |   | 1  |
|                     | +16331A>R                        |   | 1  |
|                     | +16390G>R                        |   | 1  |
|                     | +16419C>Y, 16468T>Y              |   | 1  |
|                     | +485T>Y                          |   | 1  |
|                     | 8CT6C                            |   | 2  |
|                     | 8CT6C/9CT6C                      |   | 5  |
|                     | 9CT6C/10CT6C                     |   | 16 |

<sup>a</sup> Mutation was scored relative to the revised CRS <sup>1</sup>. A site heterogeneous for both thymidine (T) and cytidine (C) was abbreviated as Y, and heterogeneous for adenosine (A) and guanosine (G) was abbreviated as R. We highlight the status of the length mutations of the C-tract at region 303-309 and the dinucleotide AC repeat at region 515-524 in these cells differ from the aggregated sequence by listing all of the status, e.g. 8CT6C means region 303-315 is CCCCCCCTCCCCC in the cell, 8CT6C/9CT6C means region 303-315 has heteroplasmy of CCCCCCCTCCCCC and

CCCCCCCCCTCCCCC in the cell, 523-524delAC means this cell contains 4 repeats of AC at region 515-524, while 523-524insAC/non-ins means co-existing of 6 and 5 repeats of AC at region 515-524 in the cell. +, extra mtDNA nucleotide changes compared with the aggregate sequence. Back mutations relative to the sequence variations in aggregate sequence are in brackets.

<sup>b</sup> The aggregate sequence of AGM contains 9CT6C/10CT6C/11CT6C in region 303-315 in HVS-II. The length mutations of the C-tract in region 16184-16193 due to 16189T>C mutation were not scored.

<sup>c</sup> The length mutations of the C-tract in region 16184-16193 due to 16189T>C mutation in MFSS were discarded.

<sup>d</sup> The aggregate sequence of the relapsed patient OAM contains 16488C>C/A compared with the consensus sequence of this individual in supplementary online Table 2. The status of no mutation at site 16488 was demonstrated as 16488C.

<sup>e</sup> The aggregate sequence of UPN17 contains 189A>R and 8CT6C/9CT6C. The status of a homoplasmic mutation or no mutation at site 189 was highlighted as 189G and 189A, respectively. The length mutations of the C-tract in region 16184-16193 due to 16189T>C mutation were not scored.

<sup>f</sup> The aggregate sequence of UPN3 contains 8CT6C/9CT6C in region 303-315 in HVS-II.

<sup>g</sup> The list of nucleotide substitutions in donor 6 is a consensus result of triplicates of independent amplifications using the original single cell lysate.

<sup>h</sup> The length mutations of the C-tract in region 16184-16193 due to 16189T>C mutation in donor 9 were not counted.
