# Supplementary material
Source: PubMed Central journal article supplement (PMC1785100)
Supplement: blood_blood-2006-01-011007_4.pdf [file blood_blood-2006-01-011007_4.pdf]

| Sample             | Leukemia type   | Age/Sex | Haplogroup | No. of cells | Total haplotype | Haplotype diversity |
|--------------------|-----------------|---------|------------|--------------|-----------------|---------------------|
| CD34+ and blast    |                 |         |            |              |                 |                     |
| LAA                | AML M0          | 61/F    | H          | 95           | 16              | 0.593 ± 0.046       |
| AGM                | AML M1          | 62/M    | B4b        | 96           | 11              | 0.645 ± 0.030       |
| MFSS               | AML M1          | 36/F    | L2a        | 96           | 10              | 0.180 ± 0.053       |
| JCS                | AML M1          | 40/M    | L3f        | 96           | 15              | 0.631 ± 0.030       |
| DC                 | AML M1          | 15/M    | L2a        | 96           | 18              | 0.741 ± 0.033       |
| OAM <sup>a</sup>   | AML M1          | 33/M    | D1         | 92           | 11              | 0.280 ± 0.062       |
| EMB                | AML M1          | 16/M    | D1         | 95           | 34              | 0.576 ± 0.063       |
| ERR                | AML M1          | 53/F    | A2         | 94           | 6               | 0.124 ± 0.047       |
| UPN21              | AML             | 16/F    | D1         | 82           | 7               | 0.164 ± 0.056       |
| UPN1               | AML M2          | 47/F    | T2         | 146          | 10              | 0.286 ± 0.049       |
| UPN16              | 2nd AML/MDS     | 74/F    | J1c        | 92           | 5               | 0.183 ± 0.053       |
| UPN22              | Relapsed AML    | 11/F    | H          | 65           | 20              | 0.833 ± 0.036       |
| OAM <sup>b</sup>   | Relapsed AML    | 36/M    | D1         | 96           | 6               | 0.449 ± 0.046       |
| UPN18              | AML & prior NHL | 62/F    | A2         | 92           | 8               | 0.294 ± 0.061       |
| UPN20              | CML             | 53/M    | A2         | 85           | 3               | 0.248 ± 0.056       |
| UPN17              | CML             | 27/F    | X2b        | 80           | 17              | 0.829 ± 0.030       |
| UPN2               | AML from CMML   | 58/M    | J1c        | 96           | 14              | 0.496 ± 0.055       |
| UPN3               | CLL             | 64/F    | H          | 89           | 9               | 0.307 ± 0.064       |
| UPN19 <sup>c</sup> | APML            | 21/F    | H          | 94           | 22              | 0.765 ± 0.037       |
| UPN19 <sup>d</sup> | APML            | 21/F    | H          | 96           | 10              | 0.620 ± 0.039       |
| Subtotal           | F               | F       | F          | 1873         | 252             | F                   |
| Donor 1            | F               | 48/F    | U5b        | 85           | 14              | 0.561 ± 0.052       |
| Donor 2            | F               | 44/M    | L2a        | 92           | 16              | 0.558 ± 0.059       |
| Donor 3            | F               | 36/M    | L0a1       | 93           | 12              | 0.558 ± 0.052       |
| Donor 4            | F               | 55/M    | T2         | 93           | 14              | 0.661 ± 0.050       |
| Donor 5            | F               | 35/M    | U5b        | 93           | 13              | 0.558 ± 0.053       |
| Donor 6            | F               | 35/M    | M7a1       | 95           | 15              | 0.627 ± 0.049       |
| Donor 7            | F               | 32/M    | U6         | 93           | 40              | 0.805 ± 0.041       |
| Donor 8            | F               | 25/M    | H          | 93           | 38              | 0.800 ± 0.036       |
| Donor 9            | F               | 57/M    | K1a        | 93           | 31              | 0.650 ± 0.059       |
| Donor 10           | F               | 39/M    | pre-V      | 94           | 17              | 0.622 ± 0.041       |
| Subtotal           | F               | F       | F          | 924          | 210             | F                   |
| Granulocyte        |                 |         |            |              |                 |                     |
| UPN21              | AML             | 16/F    | D1         | 24           | 8               | 0.562 ± 0.120       |
| UPN22              | Relapsed AML    | 11/F    | H          | 70           | 42              | 0.953 ± 0.016       |
| UPN20              | CML             | 53/M    | A2         | 92           | 17              | 0.487 ± 0.062       |
| UPN19              | APML            | 21/F    | H          | 79           | 23              | 0.748 ± 0.040       |

|                      |   |      |      |     |     |               |
|----------------------|---|------|------|-----|-----|---------------|
| Subtotal             | F | F    | F    | 265 | 90  | F             |
| Donor 1              | F | 48/F | U5b  | 64  | 28  | 0.809 ± 0.048 |
| Donor 2 <sup>e</sup> | F | 44/M | L2a  | 82  | 27  | 0.706 ± 0.056 |
| Donor 2 <sup>f</sup> | F | 45/M | L2a  | 96  | 16  | 0.570 ± 0.055 |
| Donor 3              | F | 36/M | L0a1 | 72  | 26  | 0.657 ± 0.065 |
| Donor 4              | F | 55/M | T2   | 76  | 27  | 0.756 ± 0.049 |
| Donor 5              | F | 35/M | U5b  | 82  | 31  | 0.645 ± 0.063 |
| Subtotal             | F | F    | F    | 472 | 155 | F             |

Note: The data of peripheral blood CD34+ cells and granulocytes for healthy donors 1 to 5 are from Ogasawara et al.<sup>2</sup> Single blasts at <sup>a</sup>diagnosis and <sup>b</sup>relapse were analyzed for patient OAM. Both <sup>c</sup>blasts (CD33+CD34-) and <sup>d</sup>normal CD34+ cells were analyzed for patient UPN19. Granulocytes from <sup>e</sup>peripheral blood and <sup>f</sup>bone marrow were analyzed for healthy donor 2. We counted the numbers of total hapotype (including the aggregate mtDNA type and the types that differ from aggregate sequence by substitution and/or indels) based on the mutations detected in each sample (see supplementary online Table 3). We utilized haplotype diversity ( $h$ )<sup>8</sup>, which was widely used in population genetic study of human and animal mtDNAs for measuring genetic diversity (e.g. references<sup>6,9</sup>), to assess the probability that two randomly chosen cells were different in order to measure the heterogeneity level in each sample according to

$$h = \frac{n}{n-1} \left( 1 - \sum_{i=1}^k p_i^2 \right)$$

, where  $n$  is the total number of cells analyzed for the donor or patient,  $k$  is the number of haplotypes, and  $p_i$  is sample frequency of the  $i$ -th haplotype.<sup>8</sup> There is statistically difference on haplotype diversity between the leukemia group and the normal control group (F test to compare variances,  $P = 0.004$ ; unpaired t-test with Welch's correction,  $P = 0.007$ ; supplementary online Figure 1).
