# Supplementary material
Source: PubMed Central journal article supplement (PMC1785100)

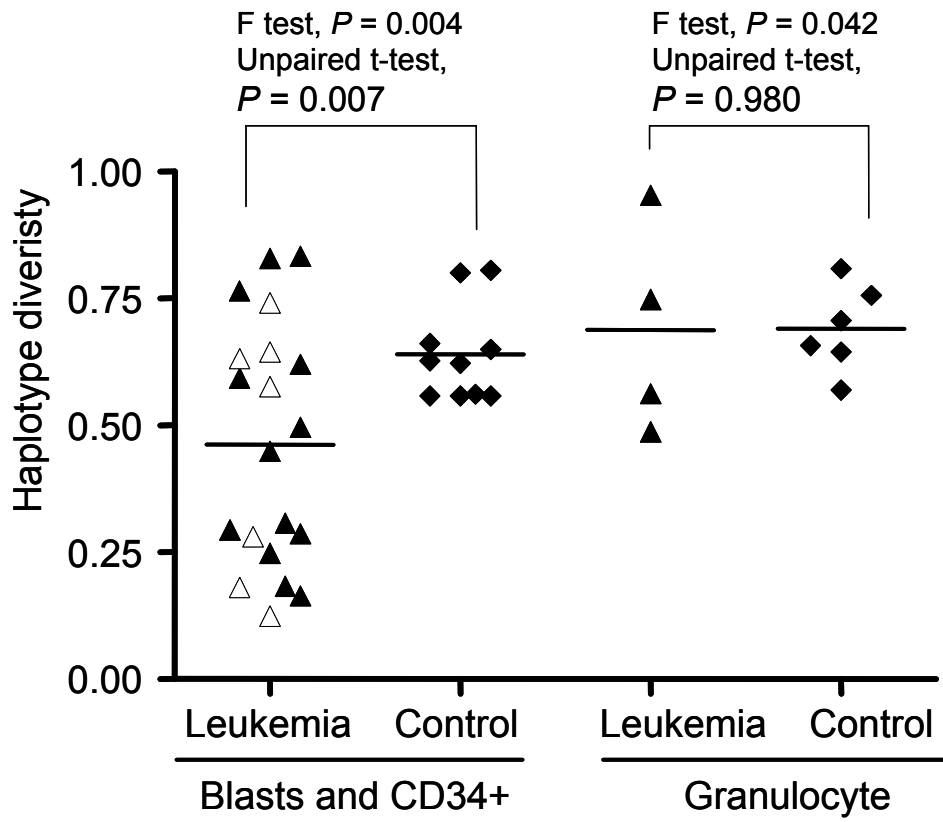

Supplement: blood_blood-2006-01-011007_5.pdf [file blood_blood-2006-01-011007_5.pdf]
